# Supplementary material for: Modular polyketide synthase ketosynthases collaborate with upstream dehydratases to install double bonds
Source: Chem Commun (Camb). 2024 Jul 19;60(66):8712–5. doi: 10.1039/d4cc03034f (PMC11321453; doi:10.1039/d4cc03034f)
Supplement: CC-060-D4CC03034F-s001 [file CC-060-D4CC03034F-s001.xlsx]

## Sheet: 1
P1-P2-P3-P7 Variant	EIC peak area for replicate A	Concentration (µM) A	EIC peak area for replicate B	Concentration (µM) B	EIC peak area for replicate C	Concentration (µM) C	Average EIC peak area	Average concentration (µM)	Standard deviation (µM)
P1-P2-P3-P7	404872	366.524	553346	539.874	608860	604.689	313597	503.696	123.135
P1-P2-P3(VMAH)-P7	N.D.		N.D.		N.D.
P1-P2-P3(VAYH)-P7	135174	51.6404	127873	43.1162	133500	49.6859	79328.4	48.1475	4.4655
P1-P2-P3(VAAH)-P7	333866	283.622	279361	219.985	345016	296.64	191749	266.749	41.0185
P1-P2-P3(VNYH)-P7	369988	325.796	340191	291.006	329276	278.263	208014	298.355	24.6038
P1-P2-P3(VNGH)-P7	388769	347.723	247632	182.94	262638	200.46	179914	243.708	90.5051
P1-P2-P3(TNGH)-P7	201686	129.296	183847	108.468	203296	131.176	117813	122.98	12.6027
P1-P2-P3(TNGQ)-P7	137557	54.4227	111971	24.5499	118532	32.2102	73627.8	37.0609	15.5159
P1-P2-P3(AmpKS15)-P7	N.D.		N.D.		N.D.

## Sheet: 2
P1-P2-P3-P7 Variant	UV peak area for replicate A	Concentration (µM) A	UV peak area for replicate B	Concentration (µM) B	UV peak area for replicate C	Concentration (µM) C	Average UV peak area	Average concentration (µM)	Standard deviation (µM)
P1-P2-P3-P7	31.1	3.25433	36.9	3.4474	35.2	3.39081	34.4	3.36418	0.0992547
P1-P2-P3(VMAH)-P7	N.D		N.D.		N.D.
P1-P2-P3(VAYH)-P7	24.6	3.03795	57.1	4.11984	24.1	3.0213	35.2667	3.39303	0.62949
P1-P2-P3(VAAH)-P7	107.4	5.79427	151.6	7.26565	96.4	5.4281	118.467	6.16267	0.972592
P1-P2-P3(VNYH)-P7	133.8	6.6731	101.3	5.59121	117.5	6.13049	117.533	6.1316	0.540946
P1-P2-P3(VNGH)-P7	485.4	18.3775	396.4	15.4148	435.6	16.7197	439.133	16.8373	1.48486
P1-P2-P3(TNGH)-P7	316.7	12.7617	323.7	12.9947	287.3	11.783	309.233	12.5131	0.642962
P1-P2-P3(TNGQ)-P7	401.4	15.5812	338.2	13.4774	278.9	11.5033	339.5	13.5206	2.03929
P1-P2-P3(AmpKS15)-P7	N.D		N.D.		N.D.

## Sheet: 3
P1-P2-P3-P7 Variant	UV peak area for replicate A	Concentration (µM) A	UV peak area for replicate B	Concentration (µM) B	UV peak area for replicate C	Concentration (µM) C	Average UV peak area	Average concentration (µM)	Standard deviation (µM)
P1-P2-P3-P7	57.9	4.14647	86.4	5.09521	91.5	5.26498	78.6	4.83555	0.602769
P1-P2-P3(VMAH)-P7	141.6	6.93276	106.3	5.75766	120.7	6.23702	122.867	6.30914	0.590861
P1-P2-P3(VAYH)-P7	176.4	8.09121	161	7.57856	174.1	8.01465	170.5	7.89481	0.276539
P1-P2-P3(VAAH)-P7	150.7	7.23569	216.2	9.41611	168	7.81158	178.3	8.15446	1.12993
P1-P2-P3(VNYH)-P7	121	6.247	185.7	8.4008	183.4	8.32423	163.367	7.65735	1.22199
P1-P2-P3(VNGH)-P7	272.6	11.2936	309.3	12.5153	309.2	12.512	297.033	12.107	0.704392
P1-P2-P3(TNGH)-P7	220.8	9.56924	281	11.5732	307.8	12.4654	269.867	11.2026	1.48321
P1-P2-P3(TNGQ)-P7	239.9	10.2051	232.8	9.96871	264.8	11.034	245.833	10.4026	0.559416
P1-P2-P3(AmpKS15)-P7	666.9	24.4194	740.6	26.8728	834.7	30.0053	747.4	27.0992	2.79981
