# Supplementary material for: Modular polyketide synthase ketosynthases collaborate with upstream dehydratases to install double bonds
Source: Royal Society of Chemistry journal article supplement (doi:10.1039/d4cc03034f), 2024-01-01
Supplement: d4cc03034f2.pdf [file d4cc03034f2.pdf]

## SUPPLEMENTARY INFORMATION

### **Modular polyketide synthase ketosynthases collaborate with upstream dehydratases to install double bonds**

Katherine A. Ray, Nisha Saif, Adrian T. Keatinge-Clay\*

Department of Molecular Biosciences, The University of Texas at Austin, Austin, TX

\*Email: [adriankc@utexas.edu](mailto:adriankc@utexas.edu)

| <b>Content</b>                                                                         | <b>Page</b> |
|----------------------------------------------------------------------------------------|-------------|
| Reagents and equipment                                                                 | 3           |
| Plasmid construction                                                                   | 4           |
| <b>Table S1.</b> Annotated <b>P1-P2-P3-P7</b> sequences                                | 5           |
| <b>Table S2.</b> Primers                                                               | 8           |
| Culturing <i>E. coli</i> K207-3 transformed with expression plasmids                   | 9           |
| Polyketide detection and quantification                                                | 9           |
| <b>Figure S1.</b> Representative high-resolution LC/MS analysis of <b>1</b>            | 10          |
| <b>Figure S2.</b> Representative high-resolution LC/MS analysis of <b>2</b>            | 11          |
| <b>Figure S3.</b> Representative high-resolution LC/MS analysis of <b>3</b>            | 12          |
| <b>Figure S4.</b> Representative high-resolution LC/MS/MS analysis of <b>1</b>         | 13          |
| <b>Figure S5.</b> Representative high-resolution LC/MS/MS analysis of <b>2</b>         | 14          |
| <b>Figure S6.</b> Representative high-resolution LC/MS/MS analysis of <b>3</b>         | 15          |
| Purification of <b>1</b>                                                               | 16          |
| <b>Figure S7.</b> <sup>1</sup> H NMR of <b>1</b>                                       | 16          |
| <b>Figure S8.</b> Extracted ion chromatogram calibration curve of <b>1</b>             | 17          |
| <b>Figure S9.</b> Calibration curve of lactone UV absorption                           | 17          |
| <b>Figure S10.</b> Representative UV absorbance chromatogram and spectrum for <b>2</b> | 18          |
| <b>Figure S11.</b> Representative UV absorbance chromatogram and spectrum for <b>3</b> | 18          |
| Modeling intermediates in KS substrate tunnels                                         | 18          |
| <b>Table S3.</b> Key parameters for modeled acyl-KSs                                   | 19          |
| <b>Figure S12.</b> Interactions between gatekeeping motifs and intermediates           | 20          |
| <b>Figure S13.</b> Possible incompatibility between PikACP3 and AmpKS15                | 22          |
| References                                                                             | 23          |

## METHODS

### Reagents and equipment

All restriction enzymes, HiFi DNA Assembly Master Mix, ligase, and enzyme buffers are from New England Biosciences. Yeast extract, glycerol, sodium chloride, potassium phosphate dibasic, hydrochloric acid, sodium sulfate, ethyl acetate, hexanes, methanol, acetonitrile, and formic acid are from Fisher Scientific. Potassium phosphate monobasic and all primers are from Sigma-Millipore. Sodium propionate is from Alfa Aesar. Isopropyl  $\beta$ -D-1-thiogalactopyranoside (IPTG) is from Carbosynth. Milk filters are from KenAG. Minipreps and gel extractions were performed with Promega Wizard SV kits. Streptomycin and thin layer chromatography (TLC) plates are from Sigma-Aldrich. Luria-Bertani broth is from Fisher Bioreagents. Casein is from Thermo Scientific. Deuterated chloroform is from Cambridge Isotopes. KAPA polymerase master mix is from Roche Biosciences.

All low-resolution LC/MS as well as the EIC calibration curve for **1** was obtained using an Agilent 6120 system containing a ZORBAX Eclipse Plus C<sub>18</sub> column (2.1 x 50 mm, 1.8  $\mu$ m). All high-resolution LC/MS was performed using an Agilent 6230 TOF LC/MS connected to a ZORBAX Eclipse Plus C18 column (2.1 x 50 mm, 1.8  $\mu$ m). LC/MS/MS data was collected using an Agilent 6530 with a Poroshell 300SB-C3 column (75 x 2.1 mm, 5  $\mu$ m)

## Plasmid construction

The expression plasmid for **P1-P2-P3-P7** was constructed using a BioBricks-like approach that has been described (Table S1)<sup>1</sup>. Briefly, DNA encoding the first and last pikromycin synthase modules, **P1** and **P7**, was inserted into a pCDF-1b backbone, followed by DNA encoding the 2<sup>nd</sup> and 3<sup>rd</sup> pikromycin modules, **P2** and **P3**. The DNA encoding each module is split by a T7 terminator, a T7 promoter, a *lac* operator, a ribosomal binding site, and DNA encoding cognate docking domain motifs from the Spinosyn PKS (SpnB/SpnC for **P2**, SpnC/SpnD for **P3**) within a pUC19 cloning plasmid.

DNA encoding the VMYH motif was altered through site-directed mutagenesis (Table S2). For each change, 2 fragments were amplified from the **P3** cloning plasmid using 2 pairs of primers (each consisting of a mutagenic primer that binds the VMYH-encoding region and a primer that binds the pUC19 backbone) and SLiCE-assembled<sup>2</sup>. PCR for the VAYH and VMAH mutations used the **P3** cloning plasmid as a template. PCR for the VAAH mutation used the **P3(VMAH)** cloning plasmid as the template. Several rounds of mutagenesis were needed to generate the **P3(TNGQ)** cloning plasmid. The original **P3** cloning plasmid was used to generate a **P3(VNGH)** cloning plasmid, which was then used as a template to generate a **P3(TNGH)** cloning plasmid, which was in turn used as a template for the PCR that yielded the final **P3(TNGQ)** cloning plasmid. Since PCR can introduce mutations, each KS-encoded fragment was digested with *MfeI* and *XbaI* and ligated into a **P3** cloning plasmid that had not been PCR-amplified. To make the **P3(AmpKS15)** cloning plasmid, DNA encoding the KS was amplified from *Streptomyces nodosus* ATCC 29757 and SLiCE-assembled into *MfeI/XbaI*-digested **P3** cloning plasmid. Mutations and assemblies were checked with overlapping Sanger sequencing reads of the KS-encoding regions.

Each of the **P3** cloning plasmids was digested with *HindIII* and *XbaI* and ligated into the **P1-P7** expression plasmid. DNA encoding **P2** was then similarly inserted to generate the expression plasmids encoding the **P1-P2-P3-P7** variants.

**P1-P2<sup>N</sup>** on pCDF

MAHHHHHVGTSSAGITRTGARTPVTGRGAAAWDTGEVRRRGLPPAGPDHAEHSFSRAPTDGVDRAELI  
RGEMSTVSKSESEEFVSVSNDAGSAHGTAEPVAVVGI SCRVPGARDPREFWELLAAGGQAVTDVPADRW  
NAGDFYDPRSAPGRSRSRWGGFIEDVDRFDAAFFGISPREAAEMDPQORLALGWEALERAGIDPSS  
LTGTRTGVFAGAIWDDYATLKHRQGGAAITPHTVTGLHRGIIANRLSYTLGLRGPMSVVDSGQSSSLVA  
VHLACESLRRGESELALAGGVSLNLVPSDIIIGASKFGGLSPDGRAYTFDARANGYVRGEGGGFVVLKRL  
SRAVADGDPVLAVIRGSAVNNGGAAQGMTPDAQAQEAVLREAHERAGTAPADVRYVELHGTGTPVGGP  
IEAAAALGAALGTGRPAGQPLLVGSVKTNIGHLEGAAGIAGLIKAVLAVRGRALPASLNYETPNPAIPFE  
ELNLRVNTHEYLPWEPEHDGQRMVVGVS SFGMGGTNAHVVLEEAPGGCRGASVVESTVGGSAVGGGVVW  
VVSAKSAAALDAQIERLAAFASRDRTDGVDAGAVDAGAVDAGAVARVLAGGRAQFEHRAVVVSGPDDL  
AAALAAPEGLVRGVASGVGRVAFVFPQGGTQWAGMGAELLDSSAVFAAAMAECEAALS PYVDWSLEAV  
RQAPGAPTLERVDVVQVPTFAVMVSLARVWQHGGVTPQAVVGHSSQGEIAAAYVAGALSLDDAARVVTLR  
SKSIAAHLAGKGM LSLALSEDAVLERLAGFDGLSVAAVNGPTATVVSGDPVQIEELARACEADGVRAR  
VIPVDYASHSRQVEIESELAEVLAGLSPQAPRVFFSTLEGAWITEPVLDDGGYWRNLRHRVGFAPAV  
ETLATDEGFTHFVEVSAHPVLTMALPGTVTGLATLRRDNGGQDRLVASLAEAWANGLAVDWSPLLP SAT  
GHSDLPYAFQTERHWLGEIEALAPAGEPAVQPAVLRTEAAEPAELDRDEQLRVI LDKVRAQTAQVLG  
YATGGQIEVDRTFREAGCTSLTGVDLNRINAAFGVRMAPSMIFDFPTPEALAEQLLLVHGEAAANPA  
GAEPAPVAAAGAVDEPVAIVGMACRLPGGVASPEDLWRLVAGGGDAISEFPQDRGWDVEGLYHPDPEHP  
GTSYVRQGGFIENVAGFDAAFFGISPREALAMPQORLLLETSWEAVEDAGIDP TSLRGRQVGVFTGAM  
THEYGPSLRDGGEGLDGYLLTGNTASVMGRVSYTLGLEGPALTVDTACSSSLVALHLAVQALRKGEVD  
MALAGGVAVMPTPGMFVEFSRQRGLAGDGRSKAFAASADGTSWSEGVGVLLVERLSDARRNGHQVLAV  
RGSANQD GASNGLTAPNGPSQQRVIRRALADARLTTS DVDVVEAHGTGTRLGDP IEAQAL IATYGQGR  
DDEQPLRLGSLKSNIGHTQAAAGVSGVIKMQAMRHG LLPKTLHVDEPSDQIDWSAGAVELLTEAVDWP  
EKQDGLRRAAVSSFGISGTNAHVVLEEAPVVVKLAPAPTSEGASVVEPSVGGSAVGGGVTPWVVS AKS  
AAALDAQIERLAAFASRDRTDDADAGAVDAGAVAHVLADGRAQFEHRAVALGAGADDLVQALADPDGLI  
RGTAGSVGRVAFVFPQGGTQWAGMGAELLDSSAVFAAAMAECEAALS PYVDWSLEAVVRQAPGAPTLER  
VDVVQVPTFAVMVSLARVWQHGGVTPQAVVGHSSQGEIAAAYVAGALPLDDAARVVTLRSKSIAAHLAGK  
GM LSLALNEDAVLERLSDFDGLSVAAVNGPTATVVSGDPVQIEELA QACKADGFRARIIPVDYASHSR  
QVEIESELAQVLAGLSPQAPRVFFSTLEGTWITEPVLDDGTYWRNLRHRVGFAPAIETLAVDEGFTH  
FVEVSAHPVLTMTLPETVTGLGTLRREQGGQERLVTSLAEAWVNGLPVAWTSLLPATASRPGLPTYAFQ  
AERYWLENTPAALATGDDWRYRIDWKRLPAAEGSERTGLSGRWLAVTPEDHSAQAAAVLTALVDAGAKV  
EVLTAGADDREALAARLTALTGGDGF TGVVSLLDGLVPQVAWVQALGDAGIKAPLWSV TQGAVSVGRL  
DTPADPDRAMLWGLGRVVALEHPERWAGLVDLPAQPDAAALHLVTALSGATGEDQIAIRTTGLHARRL  
ARAPLHGRRPTRDWQPHGTVLITGGTGALGSHAARWMAHGAEHLLLVSRSGEQAPGATQLTAE LTASG  
ARVTIAACDVADPHAMRTLLDAI PAETPLTAVVHTAGALDDGIVD TLTAEQVRRAHRAKAVGASV LDEL  
TRDLDLDAFVLFSSVSSTLGI PGQGNYPHNAYLDALAARRRATGRSAVSVAWGPWDGGGMAAGDGVAE  
RLRNHGVP GMDPELALAALESALGRDETAITVADIDWDRFYLAYSSGRPQPLVEELPEVRRIDARDSA  
TSGQGGSSAQGANPLAERLAAAAPGERTEILLGLVRAQAAAVLRMRS PEDVAADRAF KDIGFDSLAGE  
LRNRLTRATGLQLPATLVFDHPTPLALVSLRSEFLGDEEASAGT FEELDRWAANLPTLARDEATRAQI  
TTRLQAILQSLADVSGGTGGGSVPDR LRSATDDEL FQLLDNDLELP

**P2<sup>C</sup>-P3<sup>N</sup>**

MSNEEKLREYLRRALVDLHQARERLHEAESGEREP IAI VAMSCRYPGDIRSPEDLWRMLSEGG  
EGITPFPPTDRGWDLDGLYDADPDALGRAYVREGGFLHDAAEFDAEFFGVSPREALAMPQORM  
LLTTSWEAFERAGIEPASLRGSSTGVFIGLSYQDYAARVPNAPRGVEGYLLTGSTPSVASGRI  
AYTFGLEGPATTVDTACSSSLTALHLAVRALRS GECTMALAGGVAMMATPHMFVEFSRQRALA  
PDGRSKAFSADADGFGAAEGVGLLLVERLSDARRNGHPVLAVVRGTAVNQD GASNGLTAPNGP  
SQQRVIRQALADARLAPGDI DAVETHGTGTSLGDP IEAQGLQATY GKERPAERPLAIGSVKSN  
IGHTQAAAGAAGI I KVMVLAMRHGTLPKTLHADEPSPHVDWANSGLALVTEPIDWPAGTGPRRA

AVSSFGISGTNAHVVLEQAPDAASSGEVLGADEVPEVSETVAMAGTAGTSEVAEGSEASEAPA  
APGSREASLPGHLPWVLSAKDEQSLRGQAALHAWLSEPAADLSDADGPARLRDVGYYLATS  
TAFAHRAAVTAADRDGFLDGLATLAQGGTSAHVHLDTARDGTTAFLFTGQGSQRPGAGRELYD  
RHPVFARALDEICAHLDGHLELPLLDVMMFAAEGSAEAALLDETRYTQCALFALEVALFRLVES  
WGMRPAALLGHSVGEIAAAHVAGVFSLADAARLVAARGRLMQELPAGGAMLAVQAAEDEIRVW  
LETEERYAGRLDVAAVNGPEAAVLSGDADAAREAEAYWSGLGRRTRALRVSHAFHSAHMDGML  
DGFRAVLETVEFRRPSLTVVSNVTGLAAGPDDLCDPEYWVRHVRGTVRFLDGVVRVLRDLGVRT  
CLELGPDPGVLTAAMAADGLADTPADSAAGSPVGS PAGSPADSAAGALRPRLLVALLRRKRSET  
ETVADALGRAHAHGTGPDWHAWFAGSGAHRVDLPTYSFRRDRYWLDAPAADTAVNTAGLGLGT  
ADHPLLGAVVSLPDRDGLLLTGRLSLRTHPWLADHAVLGSVLLPGAAMVELAAHAAESAGLRD  
VRELTLLLEPLVLPHEGGVELRVTVGAPAGEPGGESAGD GARPVSLHSRLADAPAGTAWSC  
HAT  
GLLATDRPELVPVAPDRAAMWPPQGAEEVPLDGLYERLDGNGLAFGPLFQGLNAVWRYE  
GEGEVFA  
DIALPATNATAPATANGGGSAAAAPYGIHPALLDASLHAIAVGGLVDEPELVRVPFHWS  
GVT  
VHAAGAAAARVRLASAGTDAVSLSLTDGEGRPLVSVERLTLRPVTADQAAASRVGGLMHR  
VAW  
RPYALASSGEQDPHATSYGPTAVLKGDELKVAAALE SAGVEVGLYPDLAALSQDVAAGAP  
APR  
TVLAPLPAGPADGGAEGVRGTVARTLELLQAWLADEHLAGTRLLL VTRGAVRDPEGSGAD  
DGG  
EDLSHAAA WGLVRTAQTENPGRFGLLDLADDASSYRTLPSVLS DAGLRDEPQLALHDGT  
IRLA  
RLASVRPETGTAAPALAPEGTVLLTGGTGGLGGLVARHVVG EWGVRRLLLVSRRTDAP  
GADE  
LVHELEALGADVSAACDVADREALTAVLDAI PAEHPLTAVVHTAGVLS DGTLP SMTTE  
DVEH  
VLRPKVDA AFLLDLSTPAYDLAAFV MFSSAAAVFGGAGQGAYAAANATLDALAWRRRA  
AGL  
PALS LGWGLWAETSGMTGELGQADLRMSRAGIGGISDAEGIALLLDAALRDDRH  
PVLLPLRLD  
AAGLRDAAGNDPAGIPALFRDVVGARTVRARPSAASASTTAGTAGTPGTADGAAETA  
AVTLAD  
RAATVDGPARQRLLEFVVG EVAEVLGHARGHRIDAERGFLDLGFDSL TAVELRNRLNS  
AGGL  
ALPATLVFDHPSPAALASHLDAELPRGASASTVDSALAE LDRIEQQLSMLTGEARARD  
RIATR  
LRLAHEKWNSAAEVPTGADVLSTLDSATHDEIFE FIDNELDLS

**P3<sup>C</sup>-P7**

MANEEKLEFGYLKKVTADLHQTRQRL LAAESRSQEP IAI VGMACRLPGGVASPEDLWRLVAGGE  
DAISEFPQDRGWDVEGLYDPNPEATGKSYAREAGFLYEAGEFDADFFGISPREALAMPQQR  
LLEASWEAFEHAGIPAAATARGTSVGVFTGVMYHDYATRLTDVPEGIEGYLGTGNSGSV  
ASGRV  
AYTLGLEGP AVTVDTACSSSLVALHLAVQALRKGEVDMALAGGVTVMSTPSTFVEFSRQ  
RGLA  
PDGRS KSFSSSTADGTSWSEGVGVLLVERLS DARRKGHRILAVVRGTAVNQDGASSGLT  
APNGP  
SQQRVIRRALADARLTTSDVDVVEAHGTGTRLGDPIEAQAVIATYGQGRDGEQPLRLGSL  
KSN  
IGHTQAAAGVSGVIKMQAMRHGVL PKTLHVEKPTDQVDWSAGAVELLTEAMDWPDKG  
DGLR  
RAAVSSFGVSGTNAHVVLEEAPAAESSPAVEPPAGGGVWPVPSAKTSAALDAQIGQLAAY  
AE  
DRTDVPVAARALVDSRTAMEHRVAVGDSREALRDALRMPEGLVRGTVTDPGRVAFVFP  
GQ  
GTQWAGMGAELLDSSPEFAAMAECETALSPYVDWSLEAVVRQAPSAPTLDRVDVVQPV  
TFAV  
MVSLAKVWQHGGITPEAVIGHSSQGEIAAAYVAGALTLDDAARVVTLRSKSIAAHLA  
GKGMIS  
LALSEEATRQRIENLHGLSIAAVNGPTATVVS GDPTQIQELAQACEADGIRARIIPVDY  
ASHS  
AHVETIENELADVLAGLSPQTPQVPFFSTLEGTWITEPALDGGYWRNLRRHRVGFAPAV  
ETLA  
TDEGFTHFIEVSAHPVLTMTLPDKVTGLATLRREDGGQHRLTTS LAEAWANGLALDWA  
SLLPA  
TGALSPAVPDLPTYAFQHRSYWISPAGGEPAPAHTASGREAVAETGLAWGPGAEDLDEE  
GRRS  
AVLAMVMRQAASVLRCDSP EEPVDRPLREIGFDSLTA VDFRNRVNRLTGLQLPPTVVF  
EHPT  
PVALAERISDELAERNWAVAEP SDHEQAE EEEKAAAPAGARS GADTGAGAGMFRALFRQ  
AVEDD  
RYGEFLDVLAEASAFRPQFASPEACSERLDPVLLAGGPTDRAE GRAVLVGTGTAANGG  
PHEF  
LRLSTS FQEERDFLAVPLPGYGTGTGTGTALLPADLDTALDAQARAILRAAGDAPV  
VLLGHSG  
GALLAHELAFRLERAHGAPPAGIVLVDPYPPGHQEP I EVWSRQLGEGLFAGELEPMS  
DARLLA

MGRYARFLAGPRPGRSSAPVLLVRASEPLGDWQEERGDWRAHWDLPHTVADVPGDHF<sup>TMMRDH</sup>  
APAVAEAVLSWLD<sup>AIEGIEGAGK</sup>

**AmpKS15**

EPIAVVGMGCRFPGGVDS PQALWEMVAGGTDVISEFPDDR<sup>GWDLEALRTSGIDDRDTSVSRG</sup>  
GFLDSIADFDPGFFGISPREAVTMDPQQRL<sup>LLETAWEAIERARIDATRLRGTRTGTFIGTNGQ</sup>  
DYAYLLVRS<sup>LDDATGDVGTGIAASAVSGRLSYTFGLEGP</sup>AITVDTACSSSLVALHLAVQSLRN  
GECTLALAGGVNVMSTPGSLVEFSRQGLAGDGRCKAFSDSADGTGWSEGA<sup>AVLALERLSDAQ</sup>  
RNGHPVLAVIRGSAVNQDGASNGFTAPNGPSQQRVIRQALS<sup>NAGLNPADVVDVVEAHGTGTPLG</sup>  
DPIEAQSILATYGQDREQPLLLGSIKSNIGHTQSAASGVAGIMK<sup>MIMAMRNEVLPKTLHVDRP</sup>  
STHVDWTAGKVELLTENRPWPTAPDRPRRSGVSSFGVSGTNAHVIVEQAPQTP

**Table S1.** Annotated **P1-P2-P3-P7** sequences. Modules **P1**, **P2**, **P3**, and **P7** are respectively shown in red, orange, yellow, and magenta text (colored as in Figures 1 and 2). Gatekeeping motifs, VMYH and TNGQ, are shown in bolded cyan text. Residues that deviate from the published sequence are shown in bold green text. Sequence encoding a His<sub>6</sub> tag on the first polypeptide is shown in black. Docking motifs from the spinosyn PKS are underlined<sup>1</sup>.

|                     |                                                         |
|---------------------|---------------------------------------------------------|
| <b>P3</b> general F | <u>CGCGTTCCTCTTCACCGGCCAGGGCAGTCA</u>                   |
| <b>P3</b> general R | <u>TGGCCGGTGAAGAGGAACGCGGTGGTGCCGT</u>                  |
|                     |                                                         |
| <b>P3 (VMAH)</b>    |                                                         |
| VMAH F              | ACCGGCGTGATGgcccCACGACTACGCCA                           |
| VMAH R              | TGGCGTAGTCGTGggcCATCACGCCGGT                            |
|                     |                                                         |
| <b>P3 (VAYH)</b>    |                                                         |
| VAYH F              | GCGTCTTCACCGGCGTGgcgTACCACGACTA                         |
| VAYH R              | TAGTCGTGGTAcgcCACGCCGGTGAAGACGC                         |
|                     |                                                         |
| <b>P3 (VAAH)</b>    |                                                         |
| VAAH F              | TTCACCGGCGTGgcccCACGACTA                                |
| VAAH R              | TAGTCGTGggccgcCACGCCGGTGAA                              |
|                     |                                                         |
| <b>P3 (VNYH)</b>    |                                                         |
| VNYH F              | GTCTTCACCGGCGTGaacTACCACGACTACGCCA                      |
| VNYH R              | TGGCGTAGTCGTGGTAgttCACGCCGGTGAAGAC                      |
|                     |                                                         |
| <b>P3 (VNGH)</b>    |                                                         |
| VNGH F              | CTTCACCGGCGTGaacggtCACGACTACGCCA                        |
| VNGH R              | TGGCGTAGTCGTGaccgttCACGCCGGTGAAG                        |
|                     |                                                         |
| <b>P3 (TNGH)</b>    |                                                         |
| TNGH F              | CACCGGCacgaacggtCACGACTACGCCA                           |
| TNGH R              | TGGCGTAGTCGTGaccgttcgtGCCGGTG                           |
|                     |                                                         |
| <b>P3 (TNGQ)</b>    |                                                         |
| TNGQ F              | CGGCacgaacggtcaaGACTACGCCACCCGT                         |
| TNGQ R              | ACGGGTGGCGTAGTCTtgaccgttcgtGCCG                         |
|                     |                                                         |
| <b>P3 (AmpKS15)</b> |                                                         |
| AmpKS15 F           | <u>GGGAGAGCGGGAACCAATTGCCGTGGTCGGCATGGGCTGCCGCTT</u>    |
| AmpKS15 R           | <u>GTACCCGGGATCCTCTAGAGGGAGTCTGAGGCGCCTGCTCGACGATGA</u> |

**Table S2.** Sequences of primers used to construct **P1-P2-P3-P7** variants. Mutagenic regions appear in lowercase, while homologous regions for SLiCE assembly are underlined.



## Culturing *E. coli* K207-3 transformed with expression plasmids

Production of **1**, **2**, and **3** was assessed from media extracts of *E. coli* K207-3 cultures<sup>3</sup>. After transforming an expression plasmid into *E. coli* K207-3, a single colony was used to inoculate 3 mL of LB media containing 100 µg/mL streptomycin. This starter culture was incubated at 37 °C and 240 rpm for 16 h before 400 µL was transferred to 40 mL of expression media [5 g L<sup>-1</sup> yeast extract, 10 g L<sup>-1</sup> casein, 15 g L<sup>-1</sup> glycerol, 10 g L<sup>-1</sup> NaCl, and 100 mM potassium phosphate buffer (pH 7.6)] containing 100 µg/mL streptomycin in a 250 mL Erlenmeyer flask covered with a milk filter disk. Cells were cultured at 37 °C, 240 rpm until OD<sub>600</sub> = 0.4. The cultures were cooled to 19 °C, and sodium propionate and IPTG were added to final concentrations of 20 mM and 0.1 mM, respectively. Cultures were incubated at 19 °C and 240 rpm for 7 d.

## Polyketide detection and quantification

After 7 d, 0.5 mL samples of culture broth were acidified with 10 µL of aqueous concentrated HCl. The acidified samples were twice extracted with 0.5 mL of ethyl acetate, concentrated *in vacuo*, and resuspended in 500 µL of 1:1 (v/v) methanol/water. High-resolution LC/MS was used to confirm compounds observed by low-resolution LC/MS (Figure S1). 5 µL of the resuspended samples were injected into an Agilent 6230 TOF LC/MS with a ZORBAX Eclipse Plus C<sub>18</sub> column (2.1 x 50 mm, 1.8 µm) using a flow rate of 1 mL min<sup>-1</sup> with a gradient of 5% solvent A [water with 0.1% (v/v) formic acid], 95% solvent B [acetonitrile with 0.1% (v/v) formic acid] to 100% solvent B over 12 min followed by 100% solvent B for 3 min. As **1** was only detected at lower gas temperatures, all samples were run with a gas temperature of 200 °C at 150 V.

The Agilent 6230 TOF LC/MS was equipped with a UV detector that allowed for the determination of inferred molar concentration based on a calibration curve of a tetraketide lactone produced in high titers from **P1-P5-P6-P7** that allowed it to be easily purified in a previous study (Figures S9–S11, Data File 1)<sup>4</sup>. Samples for UV detection were prepared the same way as high-resolution LC/MS samples, except that they were only resuspended in 125 µL of 50/50 (v/v) methanol/water. The 4x concentration allowed for UV peaks in the linear range of the calibration curve and is accounted for when calculating the inferred concentration. Unmutated **P1-P2-P3-P7** produced enough product for isolation and a calibration curve depending on the extracted ion chromatogram peak area was used to measure titers of **1** (Figure S8). The samples for quantification of **1** were prepared the same way as for high-resolution LC/MS.

LC/MS/MS samples were prepared identically to high-resolution LC/MS samples. LC/MS/MS data was collected using an Agilent 6530 with a Poroshell 300SB-C3 column

(75 x 2.1 mm, 5  $\mu$ m) using a flow rate of 0.7 mL/min with a gradient of 5% solvent A [water with 0.1% (v/v) formic acid], 95% solvent B [acetonitrile with 0.1% (v/v) formic acid] to 90% solvent B over 12 min followed by 90% solvent B for 4 min. Fragments were generated via collision induced dissociation (CID) at 10 V for **2** and **3** and 20 V for **1** (Figures S4–S6).

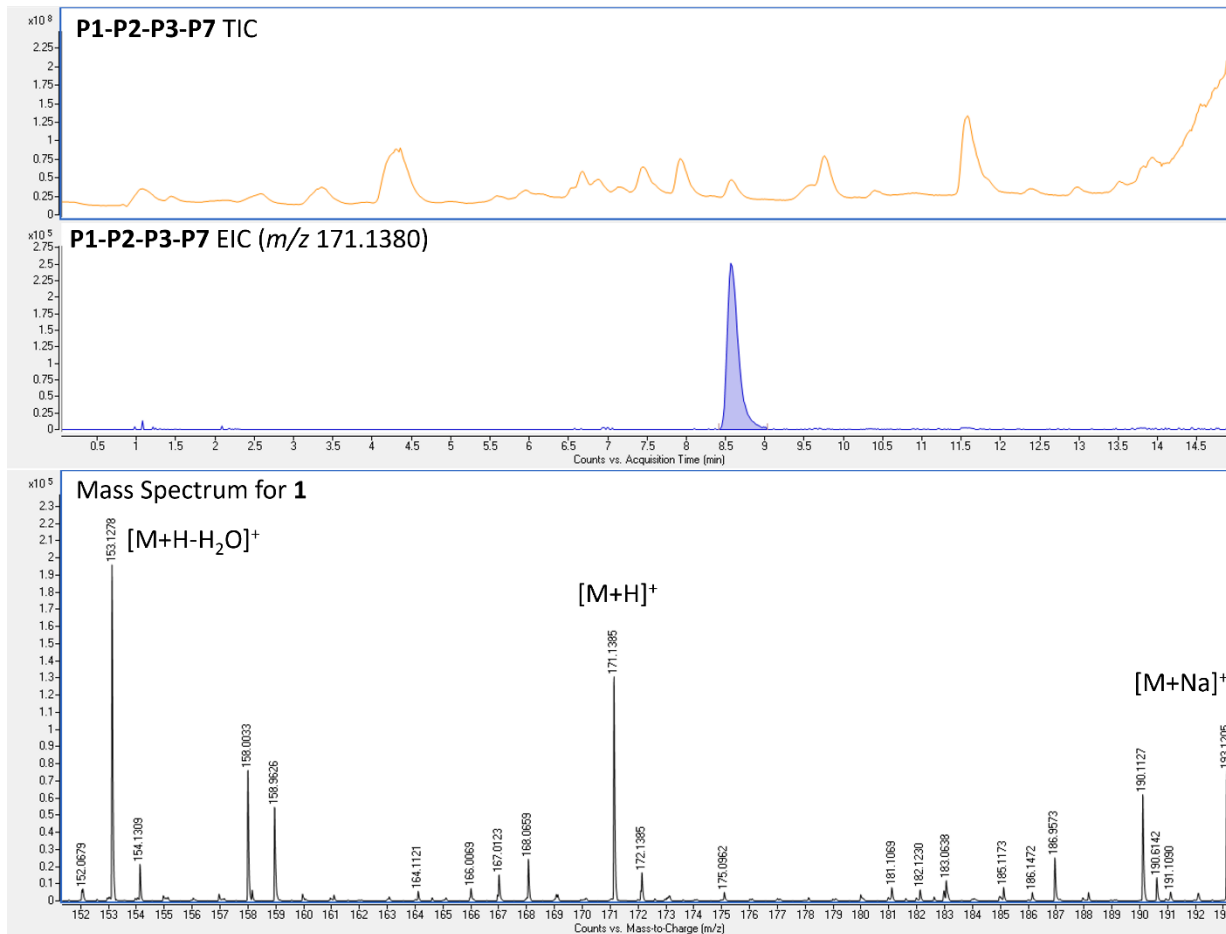

**Figure S1.** Representative high-resolution LC/MS data of media extract from *E. coli* K207-3 expressing unmutated **P1-P2-P3-P7** with the EIC peak and mass spectrum for **1**. Top, total ion chromatogram. Middle, EIC for 171.1380  $m/z$   $\pm$  100 ppm. Bottom, mass spectrum from the peak at  $t_R = 8.6$  min (**1**,  $[M+H]^+$  observed: 171.1385  $m/z$ , expected: 171.1380  $m/z$ , 3.2 ppm).

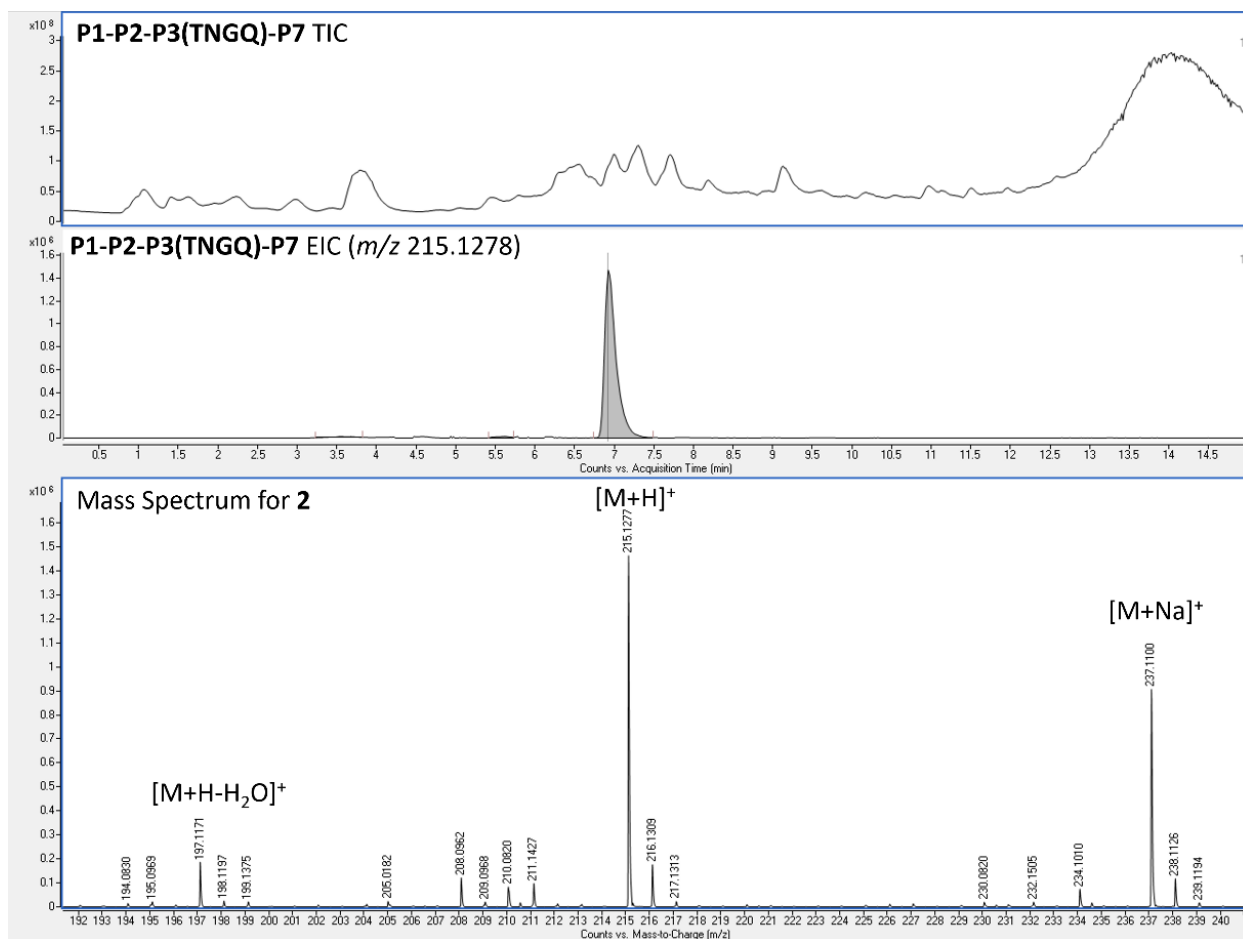

**Figure S2.** Representative high-resolution LC/MS data of media extract from *E. coli* K207-3 expressing the TNGQ variant of **P1-P2-P3-P7** with the EIC peak and mass spectrum for **2**. Top, total ion chromatogram. Middle, EIC for 215.1277  $m/z$   $\pm$  100 ppm. Bottom, mass spectrum from the peak at  $t_R = 6.9$  min (**2**,  $[M+H]^+$  observed: 215.1277  $m/z$ , expected: 215.1278  $m/z$ , -0.4 ppm).

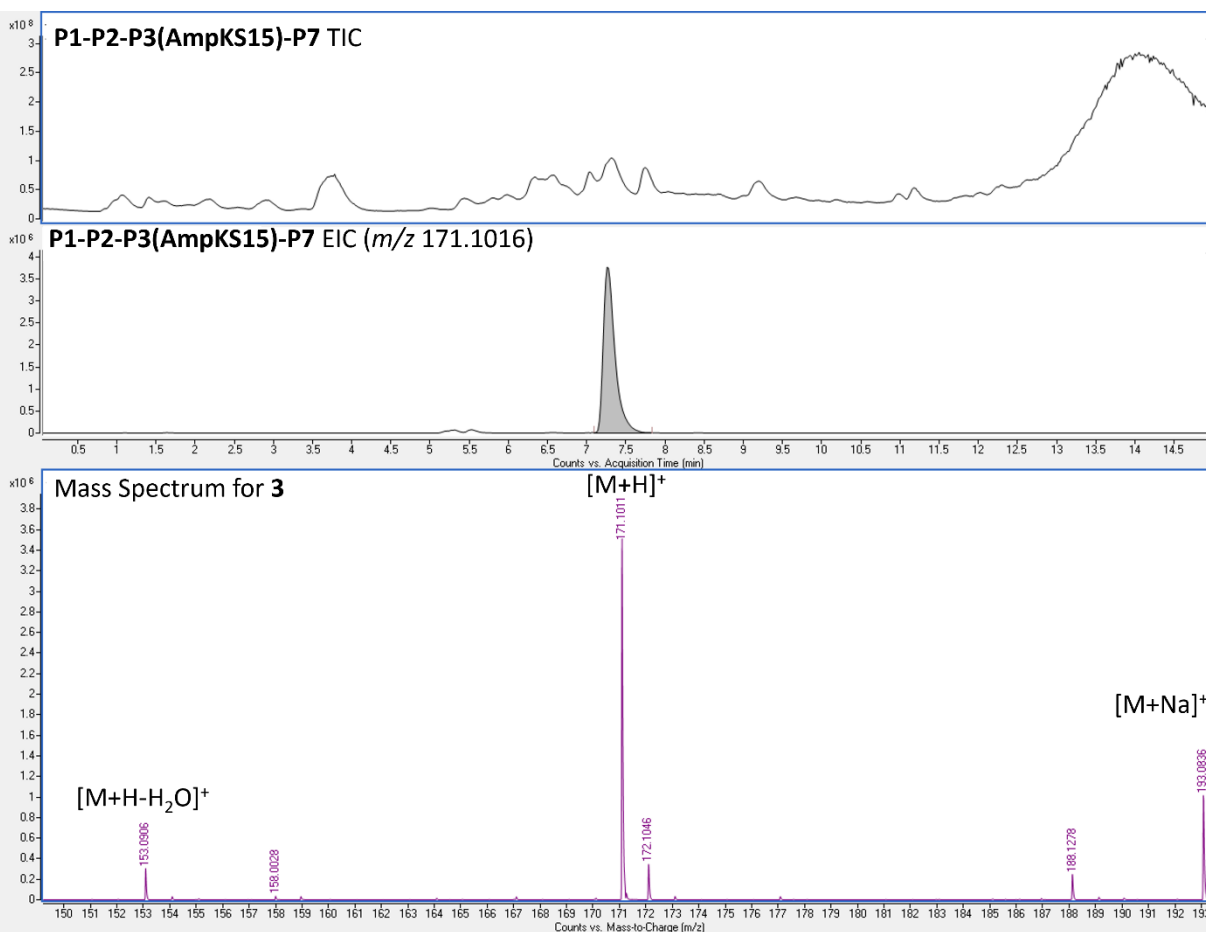

**Figure S3.** Representative high-resolution LC/MS data of media extract from *E. coli* K207-3 expressing the AmpKS15 variant of **P1-P2-P3-P7** with the EIC peak and mass spectrum for **3**. Top, total ion chromatogram. Middle, EIC for 171.1016  $m/z$  +/- 100 ppm. Bottom, mass spectrum from the peak at  $t_R = 7.4$  min (**3**,  $[M+H]^+$  observed: 171.1011  $m/z$ , expected: 171.1016  $m/z$ , -2.8 ppm).

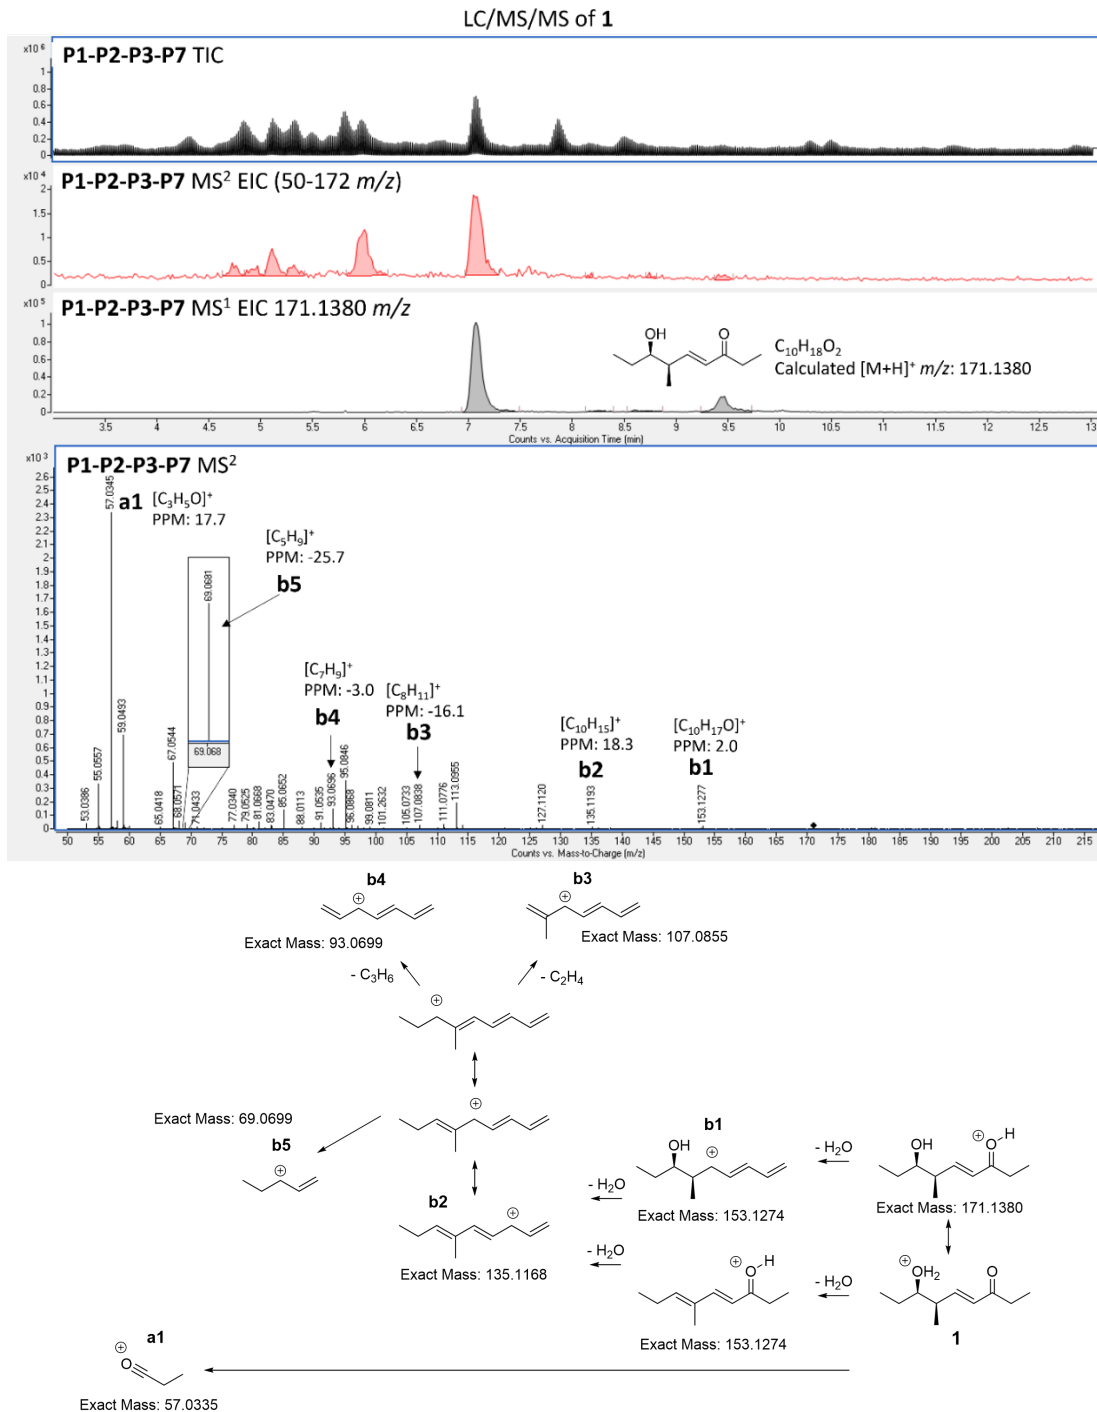

**Figure S4.** Representative LC/MS/MS data for **1** from *E. coli* K207-3 expressing **P1-P2-P3-P7**. A total ion chromatogram (TIC), an extracted ion chromatogram (EIC) for 50–172 *m/z* in the MS<sup>2</sup> data, and an EIC for 171.1380 *m/z* in the MS<sup>1</sup> data to identify the correct MS<sup>2</sup> EIC peak. The MS<sup>2</sup> spectrum is annotated based on the hypothesized fragmentation pathway (bottom). The integration window for the MS<sup>2</sup> data is 6.99–7.21 min and contains 13 scans. Collision induced dissociation (CID) was performed at 20 V to fragment molecules.

LC/MS/MS of 2

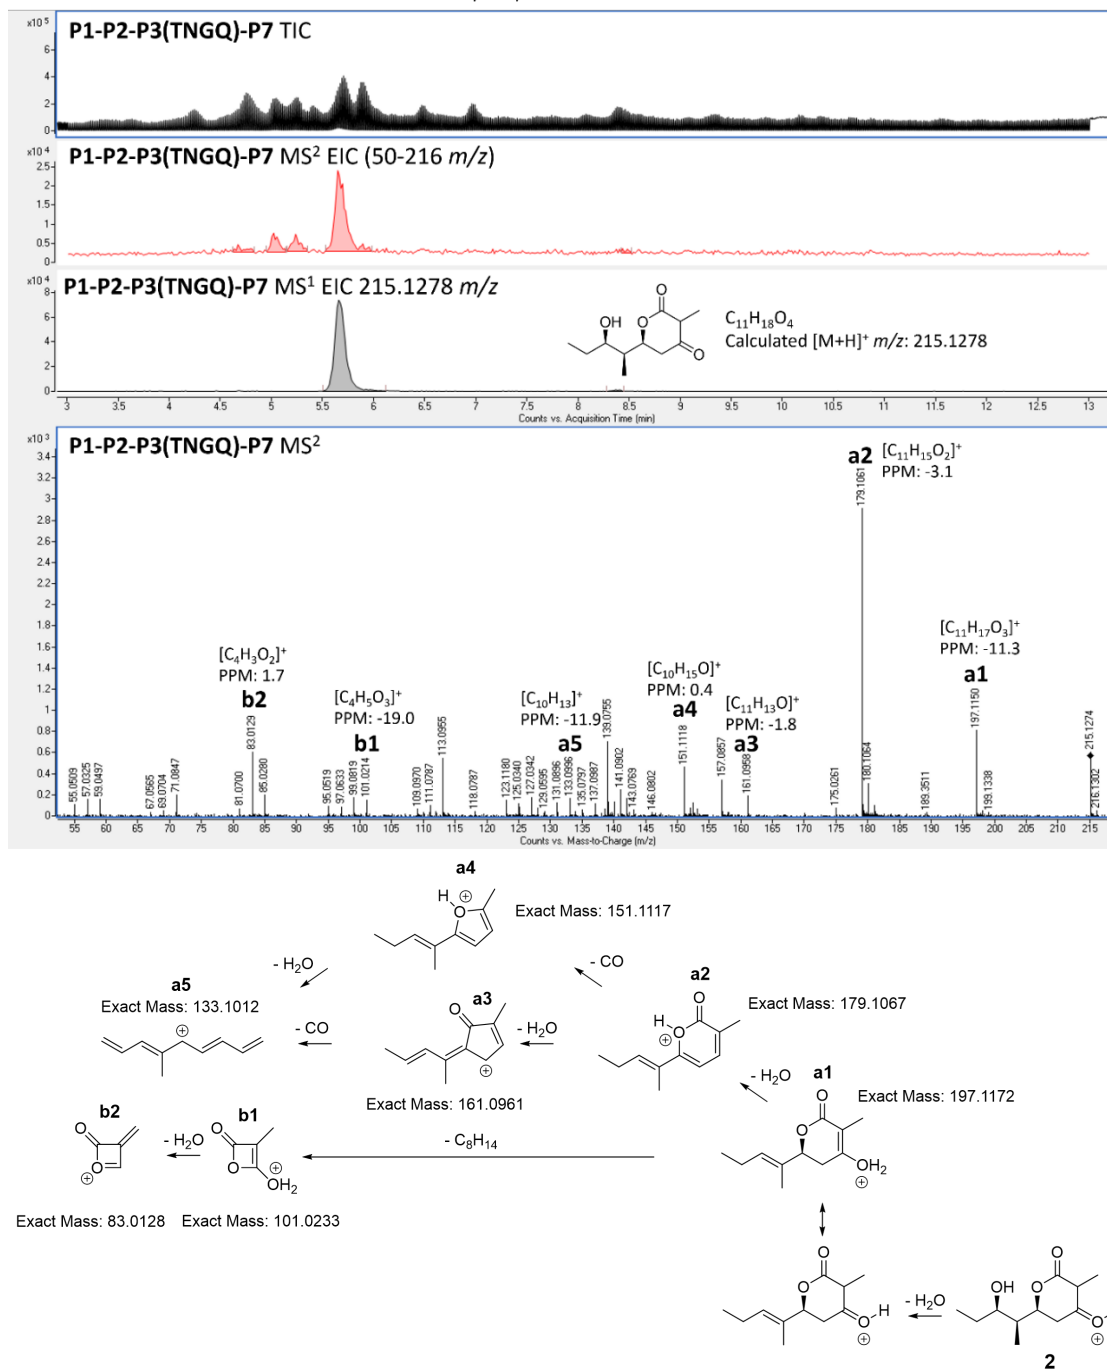

**Figure S5.** Representative LC/MS/MS data for **2** from *E. coli* K207-3 expressing the TNGQ variant of **P1-P2-P3-P7**. A total ion chromatogram (TIC), an extracted ion chromatogram (EIC) for 50–216  $m/z$  in the MS<sup>2</sup> data, and an EIC for 215.1278  $m/z$  in the MS<sup>1</sup> data to identify the correct MS<sup>2</sup> EIC peak. The MS<sup>2</sup> spectrum is annotated based on the hypothesized fragmentation pathway (bottom). The integration window for the MS<sup>2</sup> data is 5.65–5.67 min and contains 2 scans. Collision induced dissociation (CID) was performed at 10 V to fragment molecules.

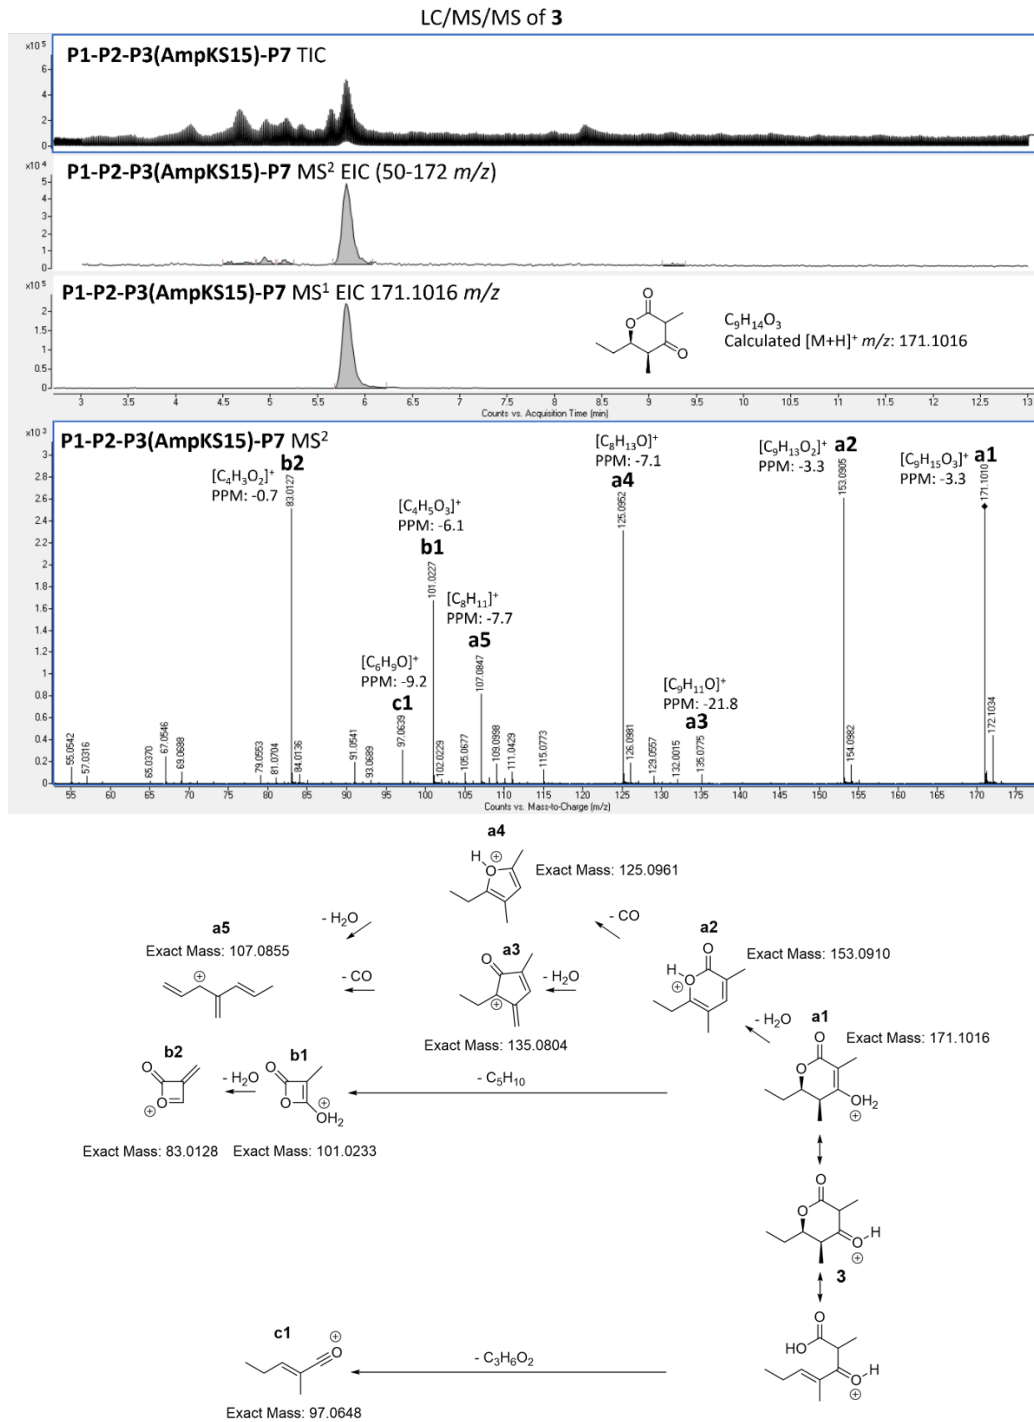

**Figure S6.** Representative LC/MS/MS data for **3** from *E. coli* K207-3 expressing the AmpKS15 variant of **P1-P2-P3-P7**. A total ion chromatogram (TIC), an extracted ion chromatogram (EIC) for 50–172  $m/z$  in the MS<sup>2</sup> data, and an EIC for 171.1016  $m/z$  in the MS<sup>1</sup> data to identify the correct MS<sup>2</sup> EIC peak. The MS<sup>2</sup> spectrum is annotated based on the hypothesized fragmentation pathway (bottom). The integration window for the MS<sup>2</sup> data is 5.73–5.93 min and contains 14 scans. Collision induced dissociation (CID) was performed at 10 V to fragment molecules.

## Purification of 1

Product **1** was purified from 1 L of *E. coli* K207-3 culture expressing **P1-P2-P3-P7**. After transforming an expression plasmid into *E. coli* K207-3, a single colony was used to inoculate 3 mL of LB media containing 100  $\mu\text{g/mL}$  streptomycin. This starter culture was incubated at 37  $^{\circ}\text{C}$  and 240 rpm for 16 h before 330  $\mu\text{L}$  was transferred to 330 mL of expression media [5  $\text{g L}^{-1}$  yeast extract, 10  $\text{g L}^{-1}$  casein, 15  $\text{g L}^{-1}$  glycerol, 10  $\text{g L}^{-1}$  NaCl, and 100 mM potassium phosphate buffer (pH 7.6)] containing 100  $\mu\text{g/mL}$  streptomycin in a 3 L flask covered with a milk filter disk. Cells were cultured at 37  $^{\circ}\text{C}$ , 240 rpm until  $\text{OD}_{600} = 0.6$ . The cultures were cooled to 16  $^{\circ}\text{C}$ , and sodium propionate and IPTG were added to final concentrations of 20 mM and 0.1 mM, respectively. Cultures were incubated at 19  $^{\circ}\text{C}$  and 240 rpm for 7 d. After incubation, the cultures were extracted twice with ethyl acetate (2 x 1 L) and dried with  $\text{Na}_2\text{SO}_4$ . The ethyl acetate extract was then filtered and dried *in vacuo* and purified by silica gel column chromatography using a 0–100% gradient of ethyl acetate/hexanes. The purest fractions were dried *in vacuo* and used to characterize **1** by  $^1\text{H}$  NMR and generate the calibration curve (Figures S7 and S8).

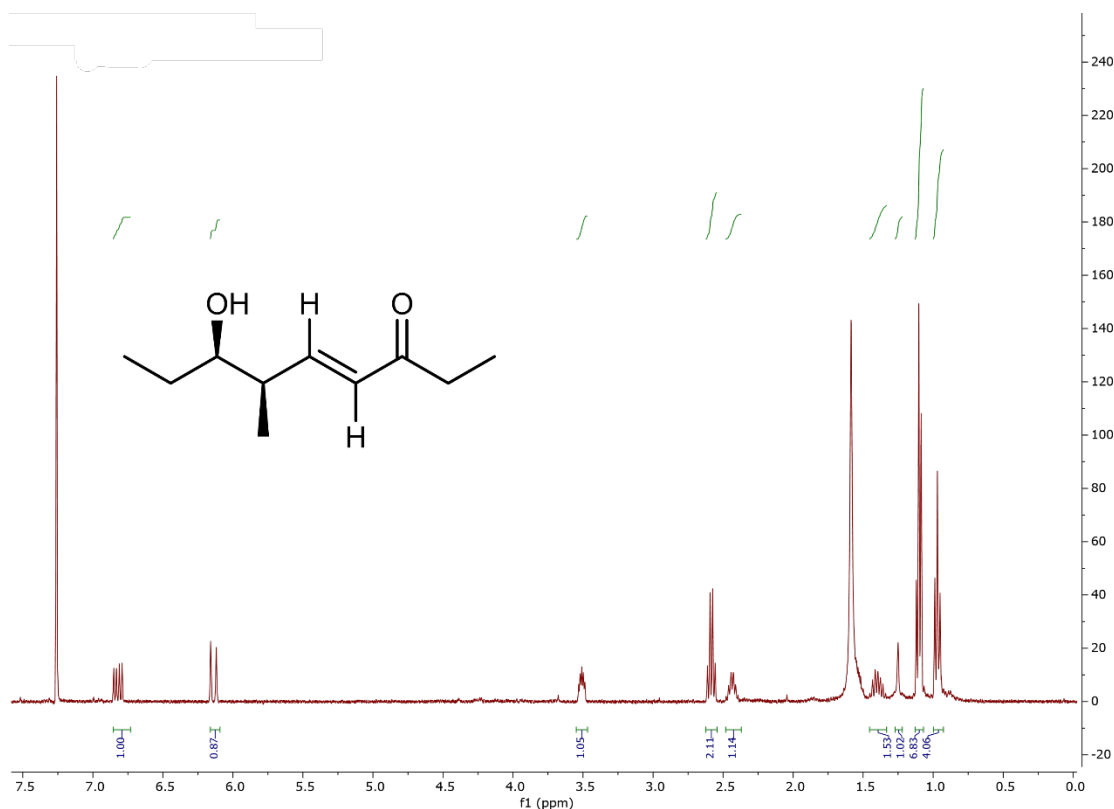

**Figure S7.**  $^1\text{H}$  NMR of **1**.  $^1\text{H}$  NMR (400 MHz,  $\text{CDCl}_3$ )  $\delta$  6.82 (dd,  $J = 16.0, 7.8$  Hz, 1H), 6.14 (d,  $J = 16.0$  Hz, 1H), 3.51 (dt,  $J = 8.9, 4.5$  Hz, 1H), 2.58 (q,  $J = 7.3$  Hz, 2H), 2.44 (h,  $J = 6.7$  Hz, 1H), 1.40 (dp,  $J = 15.0, 7.5$  Hz, 1H), 1.14–1.04 (m, 6H), 0.97 (t,  $J = 7.4$  Hz, 3H). This spectrum is in agreement with previous characterization<sup>1</sup>.



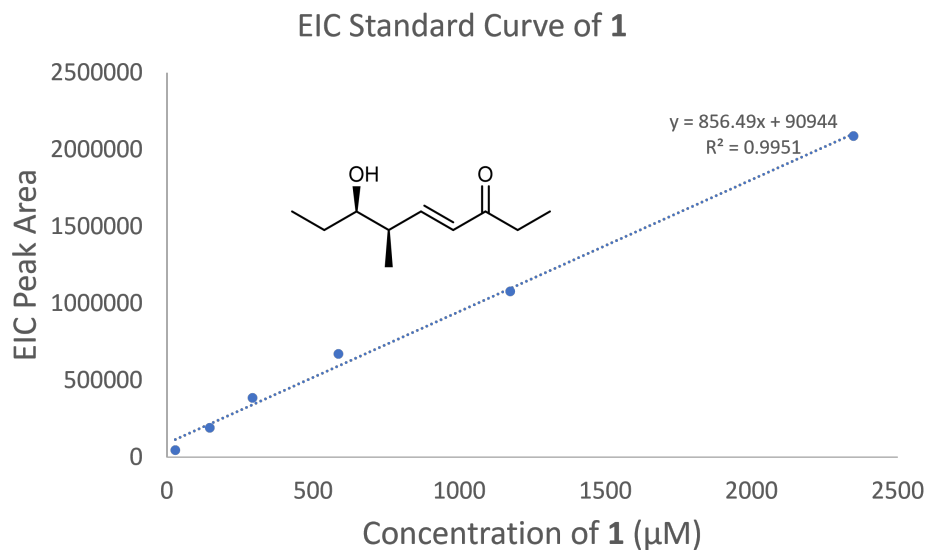

**Figure S8.** Extracted ion chromatogram calibration curve of **1**. The peak area of the extracted ion chromatogram (EIC) was used for several concentrations of purified **1** to generate a calibration curve.

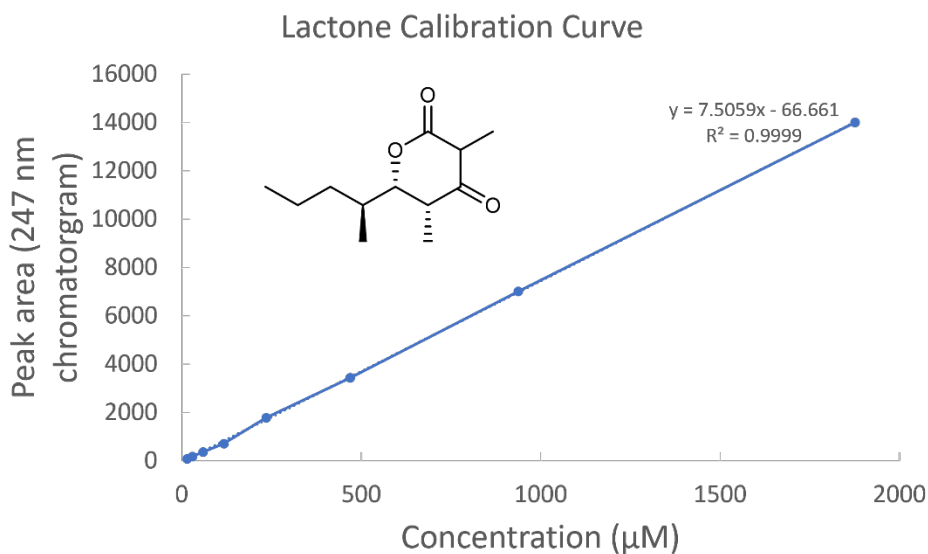

**Figure S9.** Calibration curve of lactone UV absorption. The absorption of UV light at 247 nm by the  $\beta$ -ketolactone of a reference compound (from **P1-P5-P6-P7**)<sup>4</sup> was used to generate a calibration curve for the quantification of **2** and **3**.

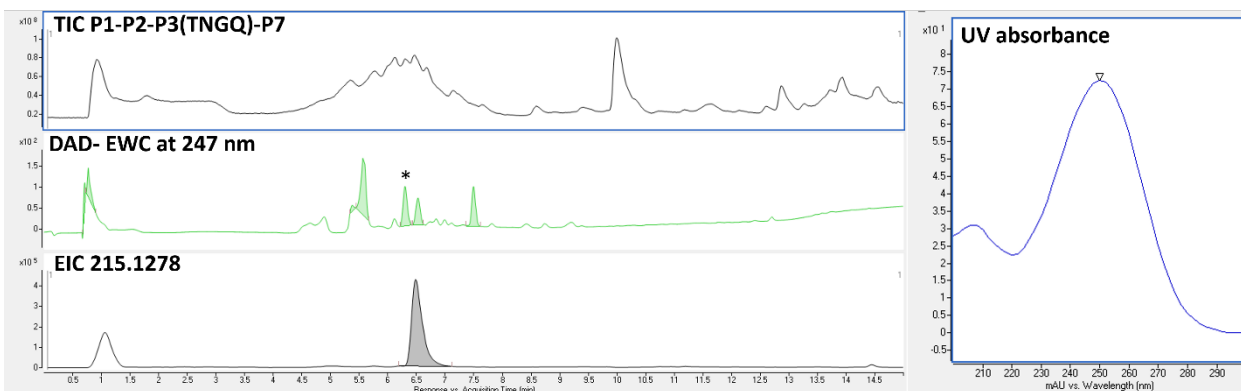

**Figure S10.** Representative UV absorbance chromatogram and spectrum for **2**. A total ion chromatogram (TIC) for the TNGQ variant of **P1-P2-P3-P7** (top), extracted wavelength chromatogram for 247 nm (EWC, middle), and EIC for **2**. The UV absorbance of the peak at 6.5 min indicated by an asterisk is shown on the right (the delay between the photodiode array and the mass spectrometer is ~10 s).

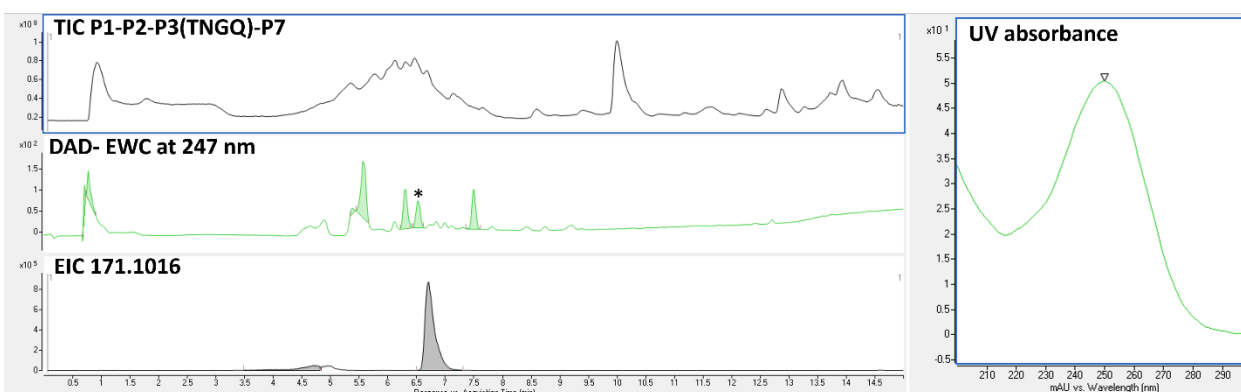

**Figure S11.** Representative UV absorbance chromatogram and spectrum for **3**. A total ion chromatogram (TIC) for the TNGQ variant of **P1-P2-P3-P7** (top), extracted wavelength chromatogram for 247 nm (EWC, middle), and EIC for **3**. The UV absorbance of the peak at 6.6 min indicated by an asterisk is shown on the right (the delay between the photodiode array and the mass spectrometer is ~10 s).

### Modeling intermediates in KS substrate tunnels

The dimeric structures of PikKS3 and its variants as well as AmpKS15 were predicted with AlphaFold 2.0<sup>5</sup>, while coordinate and restraint files for the methyl thioester analogs of D- $\beta$ -D- $\delta$ -dihydroxy-L- $\gamma$ -methylheptanoyl-PikACP3 and D- $\delta$ -hydroxy-L- $\gamma$ -methyl- $\alpha$ -heptanoyl-PikACP3 were generated by the program Sketcher<sup>6</sup> (Figures 4 and S12). The program *Coot* was used to position the intermediates as in experimentally-determined acyl-KS structures (PDBs: 2BUI, 2GFY, 2IX4, 6ROP, 7UK4)<sup>7-13</sup> where the hydrogen bond distance between the thioester oxygen and the amide nitrogen of position 32 ranges from 2.7 to 3.1 Å, the N-C $_{\alpha}$ -C $_{\beta}$ -S torsion angle of the reactive cysteine ranges from -59° to -

96°, and the O-C-C<sub>α</sub>-C<sub>β</sub> torsion angle of the acyl chain ranges from -48°, to -88° (applicable to the β-hydroxyacyl intermediate, 0° was used for the enoyl intermediate) (Table S3).

#### Hydrated intermediate bound to KS

| KS           | O(thioester) – N(32) | N-C <sub>α</sub> -C <sub>β</sub> -S torsion | O-C-C <sub>α</sub> -C <sub>β</sub> torsion |
|--------------|----------------------|---------------------------------------------|--------------------------------------------|
| PikKS3(VMYH) | 2.7 Å                | -72.6°                                      | -70.8°                                     |
| PikKS3(VAYH) | 2.7 Å                | -73.2°                                      | -73.9°                                     |
| PikKS3(VMAH) | 2.7 Å                | -71.7°                                      | -71.1°                                     |
| PikKS3(VAAH) | 2.7 Å                | -73.2°                                      | -70.2°                                     |
| PikKS3(TNGQ) | 2.7 Å                | -72.4°                                      | -69.5°                                     |
| AmpKS15      | 2.7 Å                | -68.0°                                      | -72.8°                                     |

#### Dehydrated intermediate bound to KS

| KS           | O(thioester) – N(32) | N-C <sub>α</sub> -C <sub>β</sub> -S torsion | O-C-C <sub>α</sub> -C <sub>β</sub> torsion |
|--------------|----------------------|---------------------------------------------|--------------------------------------------|
| PikKS3(VMYH) | 3.1 Å                | -72.6                                       | 0°                                         |
| PikKS3(VAYH) | 3.1 Å                | -73.2°                                      | 0°                                         |
| PikKS3(VMAH) | 3.1 Å                | -71.7°                                      | 0°                                         |
| PikKS3(VAAH) | 3.1 Å                | -73.2°                                      | 0°                                         |
| PikKS3(TNGQ) | 3.1 Å                | -72.4°                                      | 0°                                         |
| AmpKS15      | 3.1 Å                | -68.0°                                      | 0°                                         |

**Table S3.** Key parameters for modeled acyl-KSs.

view from KS dimer interface

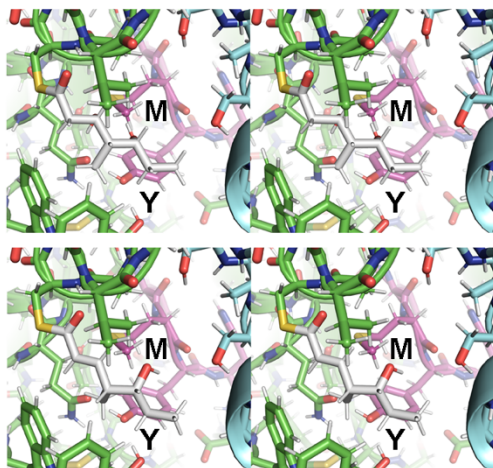

VMYH  
(w.t.)

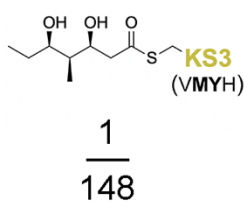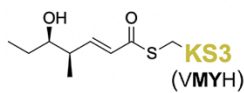

view from other KS monomer

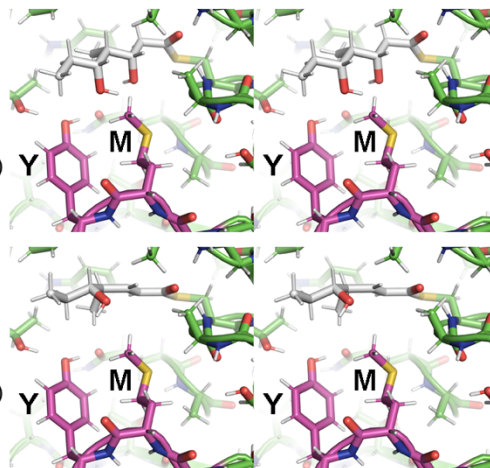

VAYH

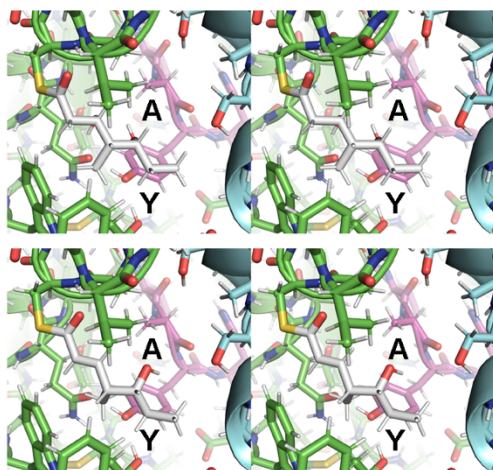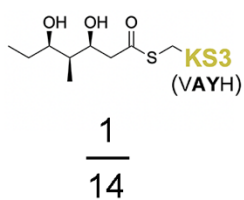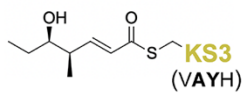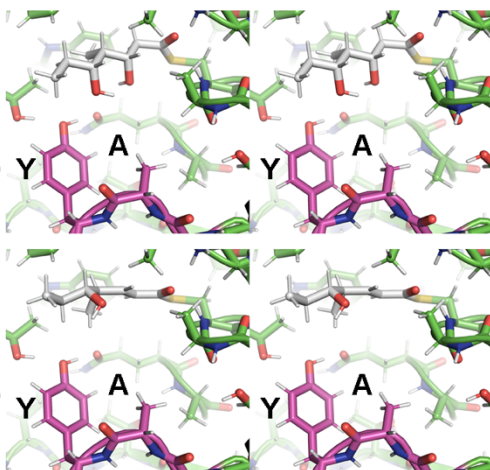

VMAH

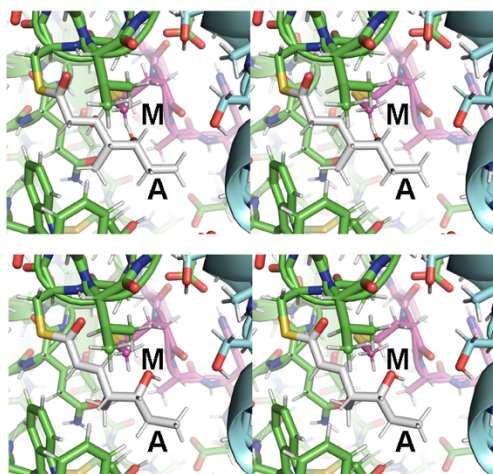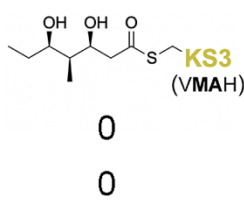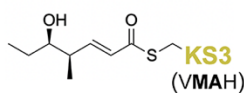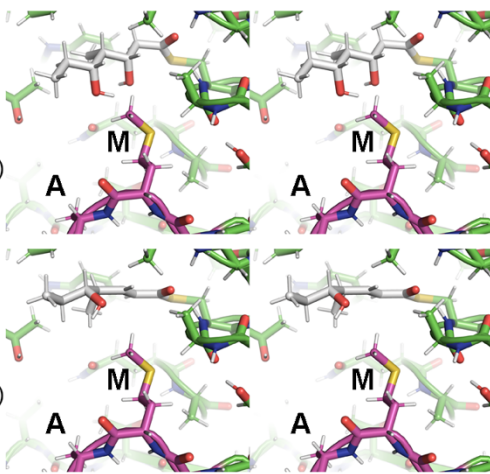



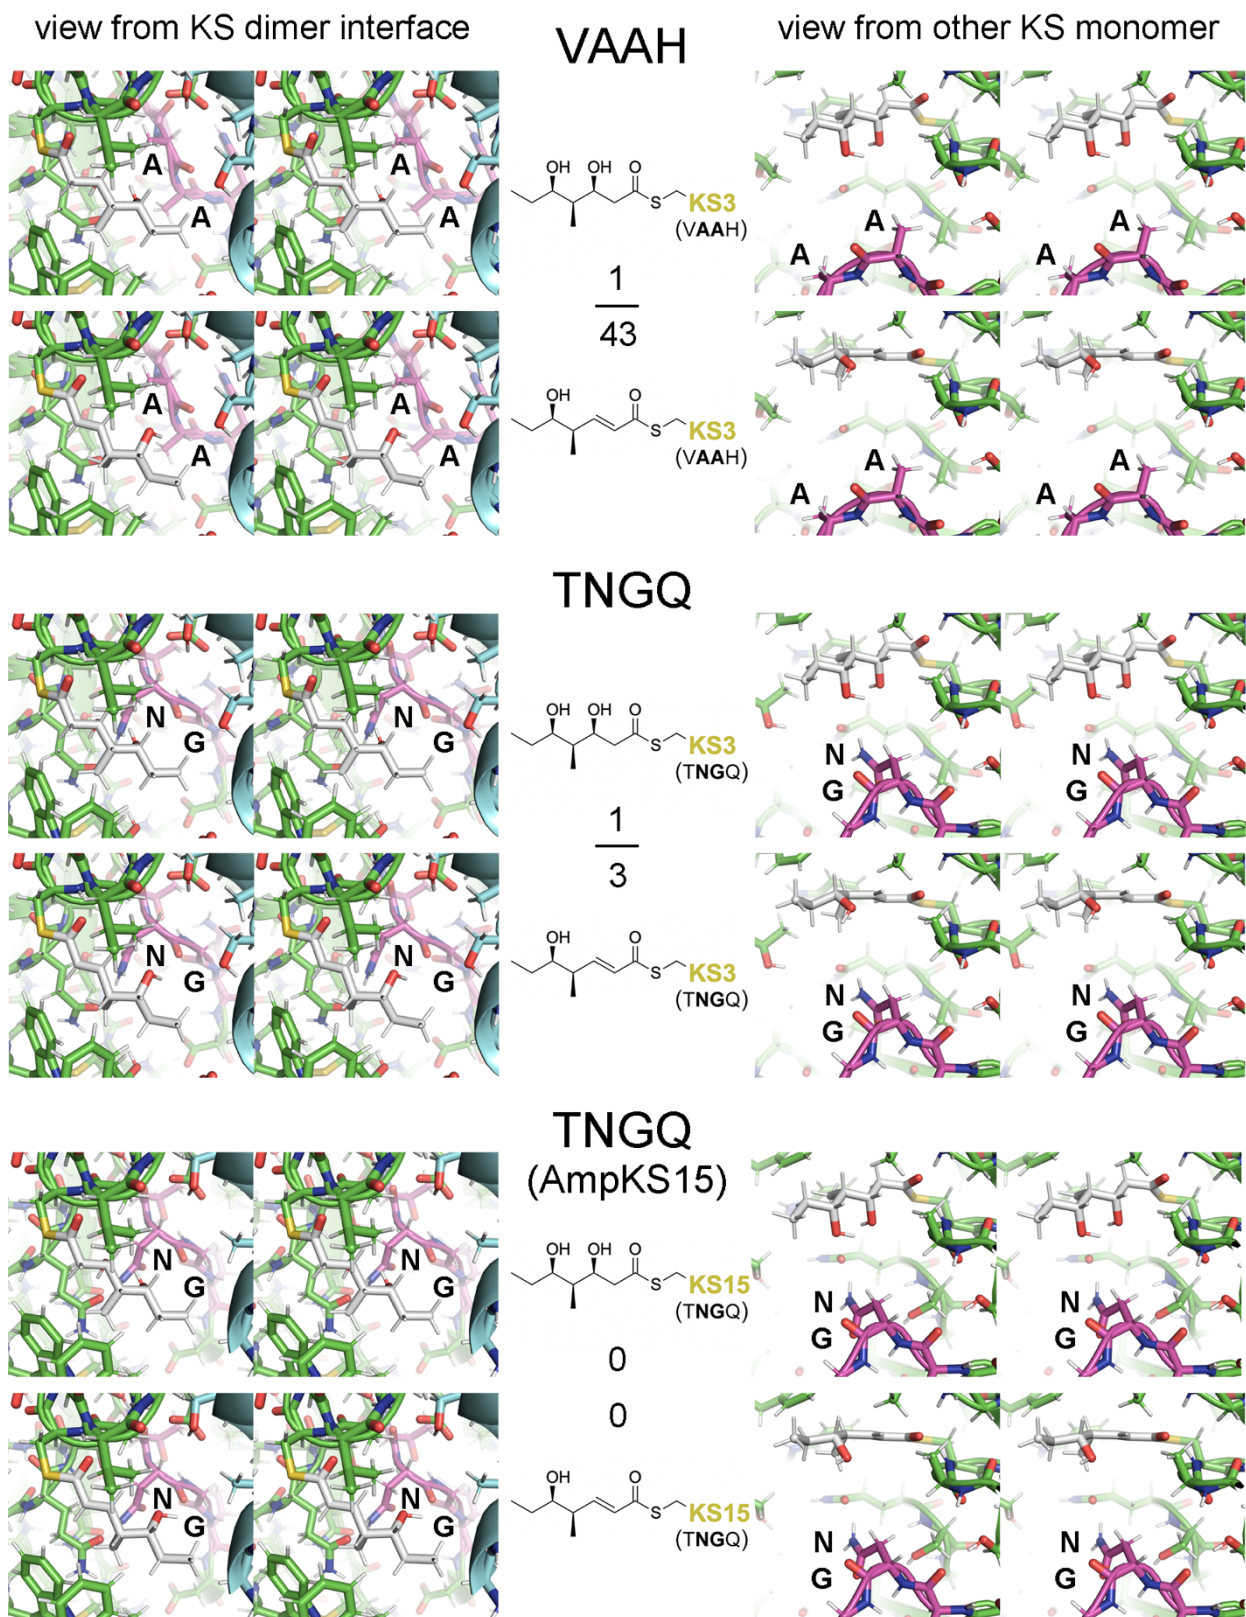

**Figure S12.** Interactions between gatekeeping residues and intermediates. The hydrated and dehydrated triketide intermediates of P1-P2-P3-P7 were modeled into PikKS3, its

VAYH, VMAH, VAAH, and TNGQ variants, and AmpKS15. The numbers in the center of each panel are from Figure 3. They report the relative production, or lack thereof, of **1** and **2** by synthases containing the indicated motif and provide a metric for how the  $\beta$ -hydroxy and  $\alpha,\beta$ -unsaturated triketide intermediates pass through PikKS3 and its variants. The stereodiagrams show how the intermediates (grey carbons) may interact with residues in the KS substrate tunnel, especially those in positions 2 and 3 (bold). AmpKS15 is a family F KS that is naturally acylated by a  $\beta$ -hydroxy intermediate and expected to be acylated by the hydrated triketide. Perhaps AmpKS15 is not acylated by the hydrated triketide in the AmpKS15 variant of **P1-P2-P3-P7** variant due to a poor interface with PikACP3 (Figure S13).

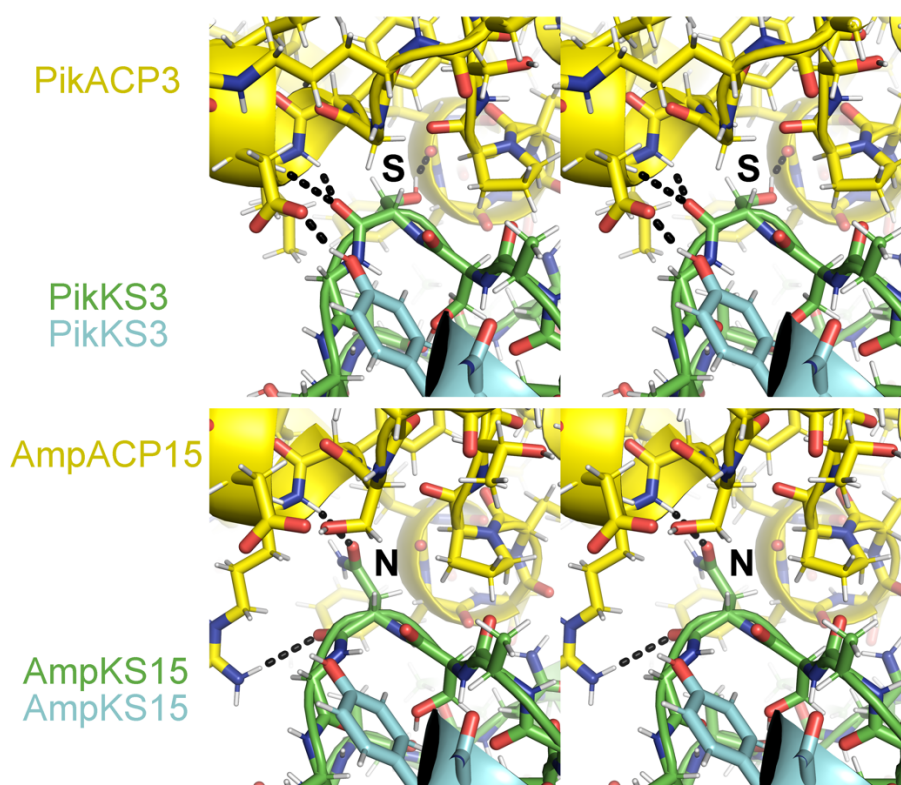

**Figure S13.** Possible incompatibility between PikACP3 and AmpKS15. Stereodiagrams show the AlphaFold 2.0 predictions of PikACP3 docking with PikKS3 and AmpACP15 docking with AmpKS15 (ACPs in yellow, KSs in green and cyan). The surface asparagine (**N**) of AmpKS15 is present in >90% of KSs and makes many contacts with AmpACP15 (hydrogen bonds illustrated with dashed lines). PikKS3 contains a less common serine (**S**) at this location that contacts PikACP3 quite differently. Thus, although the dehydrated triketide intermediate shuttled by PikACP3 appears to fit in the AmpKS15 tunnel (Figure S12), it may not enter this tunnel within the AmpKS15 variant of **P1-P2-P3-P7** due to incompatibilities between PikACP3 and AmpKS15.

## References

1. K. A. L. Ray, J. D.; Bista, R.; Zhang, J.; Desai, R. R.; Hirsch, M.; Miyazawa, T.; Cordova, A.; Keatinge-Clay, A. T. , *In review at Nat. Commun.*, 2024.
2. K. Motohashi, *Methods Mol Biol*, 2017, **1498**, 349-357.
3. S. Murli, J. Kennedy, L. C. Dayem, J. R. Carney and J. T. Kealey, *J Ind Microbiol Biotechnol*, 2003, **30**, 500-509.
4. J. Zhang, R. Bista, T. Miyazawa and A. T. Keatinge-Clay, *Metab Eng*, 2023, **78**, 93-98.
5. J. Jumper, R. Evans, A. Pritzel, T. Green, M. Figurnov, et al., *Nature*, 2021, **596**, 583-589.
6. J. Agirre, M. Atanasova, H. Bagdonas, C. B. Ballard, A. Basle, et al., *Acta Crystallogr D Struct Biol*, 2023, **79**, 449-461.
7. F. Long, R. A. Nicholls, P. Emsley, S. Graeulis, A. Merkys, et al., *Acta Crystallogr D Struct Biol*, 2017, **73**, 112-122.
8. P. von Wettstein-Knowles, J. G. Olsen, K. A. McGuire and A. Henriksen, *FEBS J*, 2006, **273**, 695-710.
9. J. Wang, S. M. Soisson, K. Young, W. Shoop, S. Kodali, et al., *Nature*, 2006, **441**, 358-361.
10. C. E. Christensen, B. B. Kragelund, P. von Wettstein-Knowles and A. Henriksen, *Protein Sci*, 2007, **16**, 261-272.
11. A. Rittner, K. S. Paithankar, A. Himmler and M. Grininger, *Protein Sci*, 2020, **29**, 589-605.
12. S. K. Kim, M. S. Dickinson, J. Finer-Moore, Z. Guan, R. M. Kaake, et al., *Nat Struct Mol Biol*, 2023, **30**, 296-308.
13. P. Emsley, B. Lohkamp, W. G. Scott and K. Cowtan, *Acta Crystallogr D Biol Crystallogr*, 2010, **66**, 486-501.
